# Supplementary material
Source: Springer Nature journal article supplement (https://www.springermedizin.de/resource/supplementary/12985_2009_663_MOESM1_ESM.pdf/9608216)

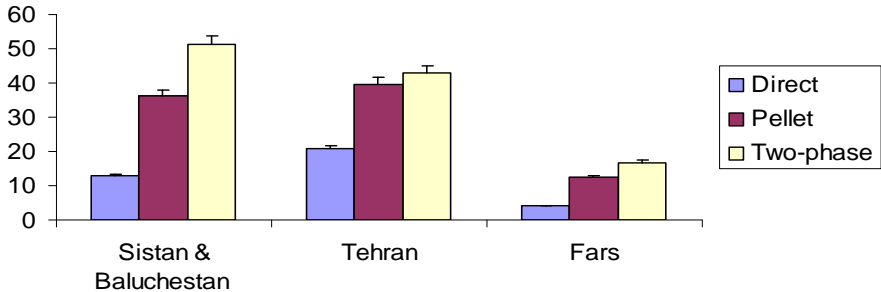

Supplement: MOESM1 [file 9608216]
